# Supplementary material
Source: Springer Nature journal article supplement (https://www.springermedizin.de/resource/supplementary/13012_2009_214_MOESM4_ESM.pdf/9629488)
Supplement: MOESM4 [file 9629488]

2387 Potentially relevant studies from electronic searches

Pubmed (1708)

Embase (178)

Cochrane (377)

CRD (124)

2295 Excluded studies from titles and abstract

Duplicates (643)

Not relevant (1652)

108 Studies selected for full text evaluation

Electronic searches (92)

Reference lists (16)

80 Excluded studies

Population (5)

Intervention (45)

Design (20)

Outcomes (6)

Others (4)

28 Studies selected for quality assessment

1 Excluded study on quality

27 Studies included in analysis
